# Supplementary material
Source: publisher site journal article supplement (https://www.dovepress.com/article/478589)
Supplement: Supplementary file 1 [file get_supplementary_file.php]

**Table S1. The primer sequence of target gene (mice).**

| **Gene** | **Primer forward (5′−3′)** | **Primer reverse (5′−3′)** |
| --- | --- | --- |
| UCP | GCTTTGCCTCACTCAGGATTGG | CCAATGAACACTGCCACACCTC |
| CEBPα | GCAAAGCCAAGAAGTCGGTGGA | CCTTCTGTTGCGTCTCCACGTT |
| LXR-α | ATCGCCTTGCTGAAGACCTCTG | CTGCTTTGGCAAAGTCTTCCCG |
| SREBP-1c | CGACTACATCCGCTTCTTGCAG | CCTCCATAGACACATCTGTGCC |
| ACC | GTTCTGTTGGACAACGCCTTCAC | GGAGTCACAGAAGCAGCCCATT |
| FGF19 | GTCGCTCTGAAGACGATTGCCA | CAGTCTTCCTCCGAGTAGCGAA |
| PRDM16 | ATCCACAGCACGGTGAAGCCAT | ACATCTGCCCACAGTCCTTGCA |
| PGC-1α | GAATCAAGCCACTACAGACACCG | CATCCCTCTTGAGCCTTTCGTG |
| UCP1 | GCTTTGCCTCACTCAGGATTGG | CCAATGAACACTGCCACACCTC |
| Cidea | GGTGGACACAGAGGAGTTCTTTC | CGAAGGTGACTCTGGCTATTCC |
| Cox7a1 | AAACCGTGTGGCAGAGAAGCAG | CCCAAGCAGTATAAGCAGTAGGC |
| Tmem26 | TGGTCCTGGATACAGTGCTCAC | GGTGCATTTCAAGAAGCCACAGG |
| G6Pase | CCTTCATTGCTGAGTGGCTCAAC | CCTGGACCAGTCTCACAAGAAG |
| PCK1 | GGCGATGACATTGCCTGGATGA | TGTCTTCACTGAGGTGCCAGGA |
| PEPCK | AACGTGGCTGAGACCAGTGATG | AAGCGCGAGTTTGGATGTGCAC |
| GLUT2 | GTTGGAAGAGGAAGTCAGGGCA | ATCACGGAGACCTTCTGCTCAG |
| CD36 | GGACATTGAGATTCTTTTCCTCTG | GCAAAGGCATTGGCTGGAAGAAC |
| PPAR-γ | GTACTGTCGGTTTCAGAAGTGCC | ATCTCCGCCAACAGCTTCTCCT |
| SCD1 | GCAAGCTCTACACCTGCCTCTT | CGTGCCTTGTAAGTTCTGTGGC |
| PPAR-α | ACCACTACGGAGTTCACGCATG | GAATCTTGCAGCTCCGATCACAC |
| FGFR4 | TCCGACAAGGATTTGGCAGACC | TGGCGGCACATTCCACAATCAC |
| FASN | CACAGTGCTCAAAGGACATGCC | CACCAGGTGTAGTGCCTTCCTC |
| LPIN1 | TAAACGGAGCCGACACCTTGGA | CCGTTGTCACTGGCTTGTTTGG |
| DGAT1 | GGTTCCGTGTTTGCTCTGGCAT | CCACTGACCTTCTTCCCTGTAG |
| LPAATθ | GAAATGGTGGCATCTGTGTGGC | GCAGGCTTTCACCATTGCTCTC |
| FXR | GGGATGAGTGTGAAGCCAGCTA | GTGGCTGAACTTGAGGAAACGG |
| SHP | CCAAGGAGTATGCGTACCTGAAG | GCTCCAAGACTTCACACAGTGC |
| β-Klotho | GAAAGAGTCCACGCCAGACATG | CAGGTGAGGATCGGTAAACTGC |
| NTCP | CCTGATGCCTTTCACTGGCTTC | GGATGGTAGAACAGAGTTGGACG |
| MDR2 | GGAACAAGGAAGTCACAGTGAGC | CAGCAGCCTTTTCGTCACTTAGC |
| BSEP | CCTTGGTAGAGAAGAGGCGACA | ATGGCTACCCTTTGCTTCTGCC |
| ABCG5 | TGCCATCCTGACTTACGGAGAG | CTGCTTTGGGTGTCCACTGATG |
| ABCG8 | GGTCCTTCTGATGACATCTGGC | CGTCTGTCGATGCTGGTCAAGT |

**Table S2. The chemical constituents isolated from TNVs.**

| **No.** | **Compound name** | **Composite**  **Score** | **Formula** | **mzmed** | **rtmed** | **ppm** |
| --- | --- | --- | --- | --- | --- | --- |
| 1 | propionaldehyde | 1.00 | C10H16O2 | 169.12 | 365.65 | 1.76 |
| 2 | 2-Hydroxyacetophenone | 1.00 | C8H8O2 | 137.06 | 261.03 | 2.31 |
| 3 | 3-Furfuryl 2-pyrrolecarboxylate | 1.00 | C10H9NO3 | 192.07 | 20.74 | 1.98 |
| 4 | 3,4-Dihydrocoumarin | 1.00 | C9H8O2 | 149.06 | 188.47 | 3.80 |
| 5 | 4-Hydroxyphthalide | 1.00 | C8H6O3 | 151.04 | 79.59 | 0.20 |
| 6 | dihydroxycoumarin | 1.00 | C10H8O4 | 193.05 | 1754.89 | 1.89 |
| 7 | 7-Methoxy-4-methylcoumarin | 1.00 | C11H10O3 | 191.07 | 497.17 | 0.77 |
| 8 | Amantadine | 1.00 | C10H17N | 152.14 | 503.88 | 1.22 |
| 9 | Azelaic acid | 1.00 | C9H16O4 | 189.11 | 1588.19 | 1.39 |
| 10 | Citropten | 1.00 | C11H10O4 | 207.07 | 541.68 | 1.11 |
| 11 | Cuminaldehyde | 1.00 | C10H12O | 149.10 | 269.39 | 0.03 |
| 12 | Curcumenol | 1.00 | C15H22O2 | 257.15 | 1497.20 | 1.00 |
| 13 | Floribundine | 1.00 | C18H19NO2 | 282.15 | 1592.78 | 1.04 |
| 14 | Fraxinol | 1.00 | C11H10O5 | 223.06 | 23.86 | 1.57 |
| 15 | Gallic acid | 1.00 | C7H6O5 | 171.03 | 48.60 | 3.22 |
| 16 | Glyceryl linolenate | 1.00 | C21H36O4 | 375.25 | 850.03 | 1.02 |
| 17 | DIAMINOPROPIONIC ACID | 1.00 | C3H8N2O2 | 105.07 | 635.52 | 2.52 |
| 18 | Nobiletin | 1.00 | C21H22O8 | 403.14 | 652.87 | 0.10 |
| 19 | P-Anisic acid | 1.00 | C8H8O3 | 153.05 | 51.31 | 2.17 |
| 20 | Paeonol | 1.00 | C9H10O3 | 167.07 | 1730.69 | 0.62 |
| 21 | Paracetamol | 1.00 | C8H9NO2 | 152.07 | 1770.62 | 3.72 |
| 22 | Pyridoxine | 1.00 | C8H11NO3 | 170.08 | 94.92 | 0.13 |
| 23 | Pyroglutamic acid | 1.00 | C5H7NO3 | 130.05 | 34.07 | 0.38 |
| 24 | Scopoletin | 1.00 | C10H8O4 | 193.05 | 1645.45 | 2.37 |
| 25 | Sesamol | 1.00 | C7H6O3 | 139.04 | 52.92 | 2.18 |
| 26 | Tyramine | 1.00 | C8H11NO | 121.06 | 850.03 | 3.65 |
| 27 | Venoterpine | 1.00 | C9H11NO | 150.09 | 589.33 | 1.82 |
| 28 | p-Cymene | 1.00 | C10H14 | 135.12 | 580.63 | 0.81 |
| 29 | Betaine | 1.00 | C5H11NO2 | 118.09 | 1607.19 | 1.78 |
| 30 | p-Mentha-1,3,8-triene | 1.00 | C10H14 | 135.12 | 478.74 | 2.60 |
| 31 | 6-Hydroxyindole | 1.00 | C8H7NO | 134.06 | 352.00 | 1.13 |
| 32 | Zedoarol | 1.00 | C15H18O3 | 247.13 | 183.32 | 2.65 |
| 33 | Acetic anhydride | 1.00 | C4H6O3 | 103.04 | 46.55 | 2.05 |
| 34 | Chaulmoogric Acid | 1.00 | C18H32O2 | 298.27 | 798.33 | 0.10 |
| 35 | (-)-3-Thujene | 1.00 | C10H16 | 137.13 | 644.03 | 3.22 |
| 36 | Isofraxidin | 1.00 | C11H10O5 | 223.06 | 1708.58 | 0.96 |
| 37 | Methyl nicotinate | 1.00 | C7H7NO2 | 138.05 | 38.08 | 0.39 |
| 38 | Coumaric acid | 1.00 | C9H8O3 | 147.04 | 186.77 | 1.82 |
| 39 | Palmatine | 1.00 | C21H22NO4 | 352.15 | 446.52 | 0.93 |
| 40 | Di (2-ethylhexyl) phthalate | 0.99 | C24H38O4 | 391.28 | 1099.18 | 1.24 |
| 41 | Fallacinol | 0.99 | C16H12O6 | 301.07 | 515.33 | 2.13 |
| 42 | Asparagine | 0.99 | C4H8N2O3 | 133.06 | 37.80 | 1.94 |
| 43 | Phenylalanine | 0.99 | C9H11NO2 | 166.09 | 79.59 | 0.40 |
| 44 | p-Mentha-2,4-diene | 0.99 | C10H16 | 137.13 | 510.79 | 3.10 |
| 45 | Beta-Caryophyllene Alcohol | 0.99 | C15H26O | 240.23 | 629.32 | 1.01 |
| 46 | Hyperforin | 0.99 | C35H52O4 | 537.39 | 1330.46 | 3.21 |
| 47 | Isomyristicin | 0.98 | C11H12O3 | 193.09 | 248.59 | 1.35 |
| 48 | Kaempferide | 0.98 | C16H12O6 | 301.07 | 385.66 | 0.27 |
| 49 | Nicotinic acid | 0.98 | C6H5NO2 | 124.04 | 616.62 | 0.92 |
| 50 | methoxybenzaldehyde | 0.98 | C8H8O3 | 153.05 | 1640.91 | 1.44 |
| 51 | suberosin | 0.98 | C15H16O3 | 262.14 | 788.00 | 3.03 |
| 52 | Lucidenic acid M | 0.97 | C27H42O6 | 463.30 | 850.03 | 0.20 |
| 53 | Scoparone | 0.97 | C11H10O4 | 207.07 | 405.36 | 0.77 |
| 54 | Arginine | 0.97 | C6H14N4O2 | 175.12 | 36.27 | 1.96 |
| 55 | Thymol | 0.96 | C10H14O | 151.11 | 530.89 | 2.96 |
| 56 | trans-Ferulic acid | 0.96 | C10H10O4 | 195.07 | 137.10 | 0.44 |
| 57 | Naringenin-7-O-glucoside | 0.96 | C21H22O10 | 435.13 | 297.69 | 1.28 |
| 58 | trans-4-Coumaric acid | 0.96 | C9H8O3 | 165.05 | 202.12 | 3.21 |
| 59 | cuminyl alcohol | 0.96 | C10H14O | 133.10 | 434.43 | 1.59 |
| 60 | alpha-Cyperone | 0.96 | C15H22O | 219.17 | 796.05 | 0.67 |
| 61 | Isoleucine | 0.95 | C6H13NO2 | 132.10 | 55.79 | 2.43 |
| 62 | Kainic acid | 0.95 | C10H15NO4 | 214.11 | 1596.10 | 1.39 |
| 63 | Adenine | 0.94 | C5H5N5 | 136.06 | 48.60 | 2.91 |
| 64 | Pterolactam | 0.93 | C5H9NO2 | 116.07 | 38.90 | 3.54 |
| 65 | Geranial | 0.92 | C10H16O | 153.13 | 222.10 | 1.77 |
| 66 | DL-Pipecolinic acid | 0.92 | C6H11NO2 | 130.09 | 38.57 | 0.13 |
| 67 | Indoxyl | 0.92 | C8H7NO | 134.06 | 419.61 | 0.58 |
| 68 | Dihydroxynortropane | 0.92 | C7H13NO2 | 144.10 | 38.57 | 2.88 |
| 69 | Phthalic anhydride | 0.92 | C8H4O3 | 149.02 | 810.33 | 0.71 |
| 70 | Naphthalene-1,2-diol | 0.91 | C10H8O2 | 161.06 | 420.72 | 3.76 |
| 71 | Lysionotin | 0.91 | C18H16O7 | 345.10 | 602.44 | 2.02 |
| 72 | p-Mentha-1,3,5,8-tetraene | 0.91 | C10H12 | 133.10 | 532.60 | 1.18 |
| 73 | Sinensetin | 0.91 | C20H20O7 | 373.13 | 609.26 | 3.13 |
| 74 | cis-p-Coumaric acid | 0.91 | C9H8O3 | 165.05 | 233.78 | 3.21 |
| 75 | Ethyl p-anisate | 0.90 | C10H12O3 | 181.09 | 416.83 | 2.47 |
| 76 | Furohyperforin | 0.90 | C35H52O5 | 553.39 | 1204.07 | 1.98 |
| 77 | Methyl cinnamate | 0.89 | C10H10O2 | 163.08 | 175.39 | 1.19 |
| 78 | beta-Costic acid | 0.89 | C15H22O2 | 235.17 | 376.44 | 1.19 |
| 79 | 6-Demethoxytangeretin | 0.89 | C19H18O6 | 343.12 | 586.51 | 1.51 |
| 80 | alpha-Cyclocitral | 0.89 | C10H16O | 153.13 | 441.86 | 0.63 |
| 81 | Isosinensetin | 0.89 | C20H20O7 | 373.13 | 837.85 | 3.16 |
| 82 | Dihydrocapsaicin | 0.88 | C18H29NO3 | 308.22 | 712.45 | 0.16 |
| 83 | 5-O-Demethylnobiletin | 0.88 | C20H20O8 | 389.12 | 672.07 | 0.75 |
| 84 | (+/-)-Jasmonic acid | 0.88 | C12H18O3 | 211.13 | 515.33 | 1.02 |
| 85 | Adenosine | 0.87 | C10H13N5O4 | 268.10 | 48.60 | 2.49 |
| 86 | Xanthoxyline | 0.87 | C10H12O4 | 197.08 | 25.57 | 0.67 |
| 87 | L-Lysopine | 0.87 | C9H18N2O4 | 219.13 | 1298.45 | 1.54 |
| 88 | Camphor | 0.87 | C10H16O | 153.13 | 302.87 | 1.04 |
| 89 | 1,4,5-Naphthalenetriol | 0.86 | C10H8O3 | 177.05 | 539.50 | 1.90 |
| 90 | Veranisatin B | 0.86 | C16H20O9 | 357.12 | 314.23 | 0.59 |
| 91 | Glutathione | 0.86 | C10H17N3O6S | 308.09 | 89.00 | 1.01 |
| 92 | alpha-Linolenic acid | 0.86 | C18H30O2 | 279.23 | 771.33 | 1.63 |
| 93 | Panaquinquecol 1 | 0.84 | C18H28O3 | 293.21 | 710.65 | 1.51 |
| 94 | Polyporusterone B | 0.84 | C28H44O6 | 477.32 | 897.01 | 1.01 |
| 95 | (+/-)-Synephrine | 0.84 | C9H13NO2 | 168.10 | 45.35 | 1.65 |
| 96 | Tangeritin | 0.83 | C20H20O7 | 395.11 | 550.68 | 1.47 |
| 97 | 3,4,5-trimethoxycinnamic acid | 0.83 | C12H14O5 | 239.09 | 377.52 | 1.88 |
| 98 | Saussurea lactone | 0.83 | C15H22O2 | 235.17 | 412.75 | 1.58 |
| 99 | Maltol | 0.83 | C6H6O3 | 127.04 | 398.18 | 1.86 |
| 100 | Epinepetalactone | 0.83 | C10H14O2 | 167.11 | 349.32 | 2.90 |
| 101 | 2,3,6-Trimethylbenzaldehyde | 0.83 | C10H12O | 149.10 | 251.46 | 0.28 |
| 102 | Cinnamaldehyde | 0.81 | C9H8O | 133.06 | 201.83 | 1.60 |
| 103 | Methyl 2-furoate | 0.81 | C6H6O3 | 127.04 | 31.71 | 1.76 |
| 104 | Choline chloride | 0.80 | C5H14NO | 104.11 | 36.63 | 0.40 |
| 105 | 5-Hydroxymethylfurfural | 0.80 | C6H6O3 | 127.04 | 1669.73 | 2.62 |
| 106 | Ginsenoyne C | 0.79 | C17H24O3 | 277.18 | 641.19 | 0.86 |
| 107 | Benzofuran | 0.79 | C8H6O | 119.05 | 128.01 | 1.20 |
| 108 | Luteolin | 0.78 | C27H30O16 | 611.16 | 173.12 | 2.66 |
| 109 | Veratric acid | 0.77 | C9H10O4 | 183.06 | 25.00 | 0.55 |
| 110 | alpha-Asarone | 0.77 | C12H16O3 | 209.12 | 415.60 | 0.70 |
| 111 | Pterosin N | 0.76 | C14H18O3 | 235.13 | 664.05 | 0.60 |
| 112 | Rutacridone epoxide | 0.74 | C19H17NO4 | 324.12 | 721.21 | 0.42 |
| 113 | alpha-Methylstyrene | 0.73 | C9H10 | 119.09 | 686.37 | 3.16 |
| 114 | 2,6-Dimethoxyquinone | 0.73 | C8H8O4 | 186.08 | 1645.45 | 1.91 |
| 115 | Phenylethyl primeveroside | 0.73 | C19H28O10 | 434.20 | 317.67 | 1.91 |
| 116 | Guaiacylglycerol 2-glucoside | 0.73 | C16H24O10 | 377.15 | 262.74 | 0.59 |
| 117 | Methyl-3-hydroxybutyric acid | 0.73 | C5H10O3 | 119.07 | 151.11 | 1.69 |
| 118 | Umbelliferone | 0.72 | C9H6O3 | 163.04 | 240.04 | 0.67 |
| 119 | Vicenin 2 | 0.72 | C27H30O15 | 595.16 | 361.31 | 0.67 |
| 120 | Grandisin | 0.72 | C24H32O7 | 415.21 | 686.37 | 2.88 |
| 121 | Flavanone base +2O, 1MeO | 0.72 | C16H14O5 | 287.09 | 464.91 | 0.24 |
| 122 | α-Hydrojuglone | 0.72 | C16H18O8 | 339.11 | 367.93 | 1.31 |
| 123 | Phenethylacetate | 0.71 | C10H12O2 | 165.09 | 849.46 | 0.86 |
| 124 | Glutamylphenylalanine | 0.71 | C14H18N2O5 | 295.13 | 86.26 | 0.47 |
| 125 | Bufalin | 0.71 | C24H34O4 | 387.26 | 768.95 | 0.14 |
| 126 | Ganolucidic acid A | 0.71 | C30H44O6 | 501.32 | 541.12 | 1.66 |
| 127 | Isoglabrolide | 0.70 | C30H44O4 | 469.33 | 623.71 | 0.68 |
| 128 | Methyl N-methylanthranilate | 0.70 | C9H11NO2 | 166.09 | 638.33 | 0.51 |
| 129 | 1-O-Feruloylglucose | 0.70 | C16H20O9 | 357.12 | 159.53 | 1.84 |
| 130 | Berberine | 0.70 | C20H18NO4+ | 336.12 | 449.92 | 1.64 |
| 131 | Phenacetin | 0.70 | C10H13NO2 | 180.10 | 658.31 | 3.31 |
| 132 | 7-Methoxycoumarin | 0.69 | C10H8O3 | 177.05 | 330.06 | 1.70 |
| 133 | 3'-Hydroxy-3,9-dihydroeucomin | 0.68 | C17H16O6 | 317.10 | 432.20 | 2.28 |
| 134 | Poncirin | 0.66 | C28H34O14 | 595.20 | 464.91 | 2.31 |
| 135 | Pantothenic acid | 0.66 | C9H17NO5 | 220.12 | 94.10 | 2.34 |
| 136 | Auxin b | 0.65 | C18H30O4 | 311.22 | 529.19 | 0.99 |
| 137 | 3 Hydroxycoumarin | 0.65 | C9H6O3 | 163.04 | 304.25 | 0.63 |
| 138 | Eleutheroside E | 0.65 | C34H46O18 | 760.30 | 330.63 | 1.78 |
| 139 | Aloin | 0.63 | C21H22O9 | 419.13 | 694.37 | 0.06 |
| 140 | Naringin | 0.63 | C27H32O14 | 581.19 | 377.52 | 0.43 |
| 141 | Wikstromol | 0.62 | C20H22O7 | 413.10 | 594.90 | 1.27 |
| 142 | (+)-Alantolactone | 0.62 | C15H20O2 | 233.15 | 1496.63 | 3.18 |
| 143 | C.I. Natural Red 20 | 0.62 | C16H16O5 | 289.11 | 601.34 | 1.41 |
| 144 | Gerberinol | 0.62 | C21H16O6 | 365.10 | 37.93 | 1.48 |
| 145 | Dibutylphthalate | 0.61 | C16H22O4 | 279.16 | 810.33 | 1.14 |
| 146 | Iristectorigenin B | 0.61 | C17H14O7 | 331.08 | 545.09 | 0.79 |
| 147 | Phlorin | 0.60 | C12H16O8 | 289.09 | 45.67 | 0.55 |
| 148 | Isolimonic acid 16->17-lactone | 0.60 | C26H32O9 | 489.21 | 560.64 | 2.49 |


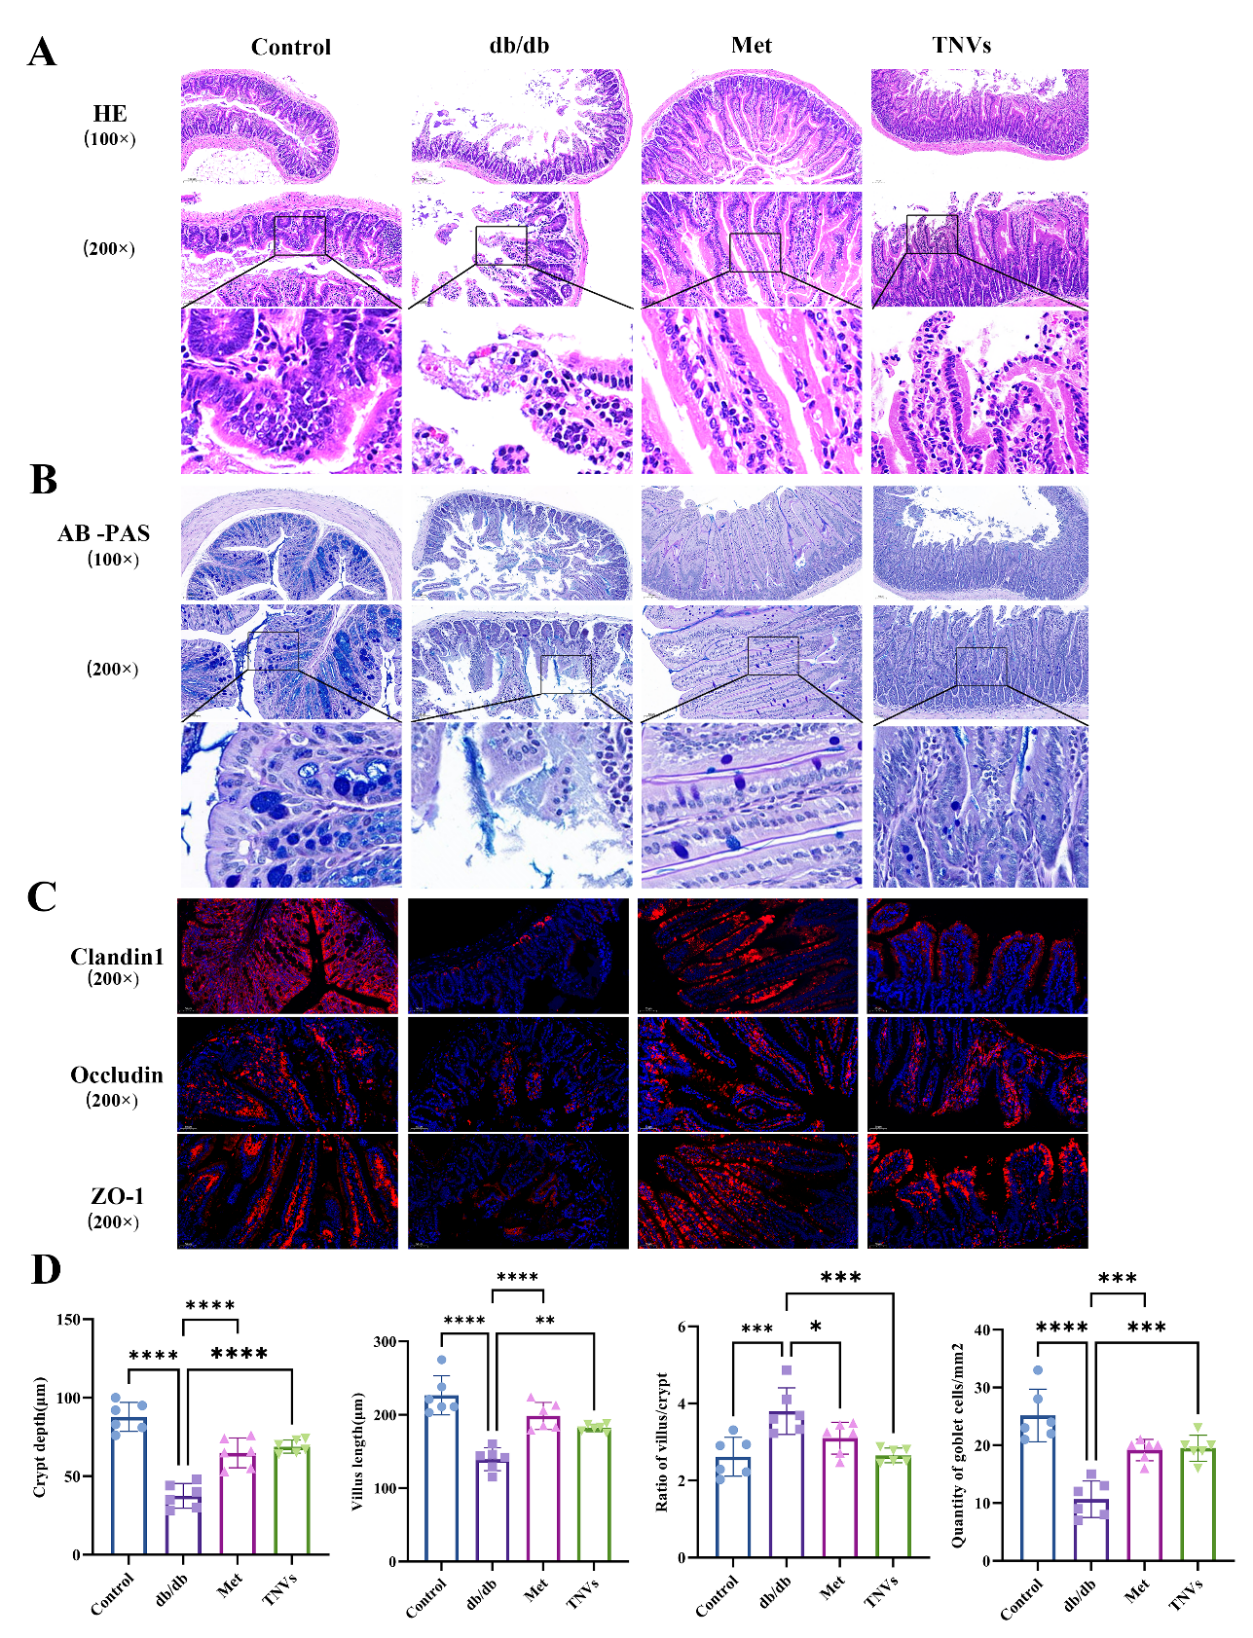


**Figure S1.** **Effect of TNVs on the colonic mucosal barrier in *db/db* mice.** (A) H&E staining of the colon. (B) AB-PAS staining of the colon. (C) Immunofluorescence staining of Claudin-1, Occludin, and ZO-1 in the colon. (D) Measurements of colon crypt depth, villus length, villus length to crypt depth ratio, and the number of goblet cells.Results are expressed as means ± SEM. n = 6, compared with the *db/db* group, **p* < 0.05, ***p* < 0.01, ****p* < 0.001, *****p* < 0.0001.


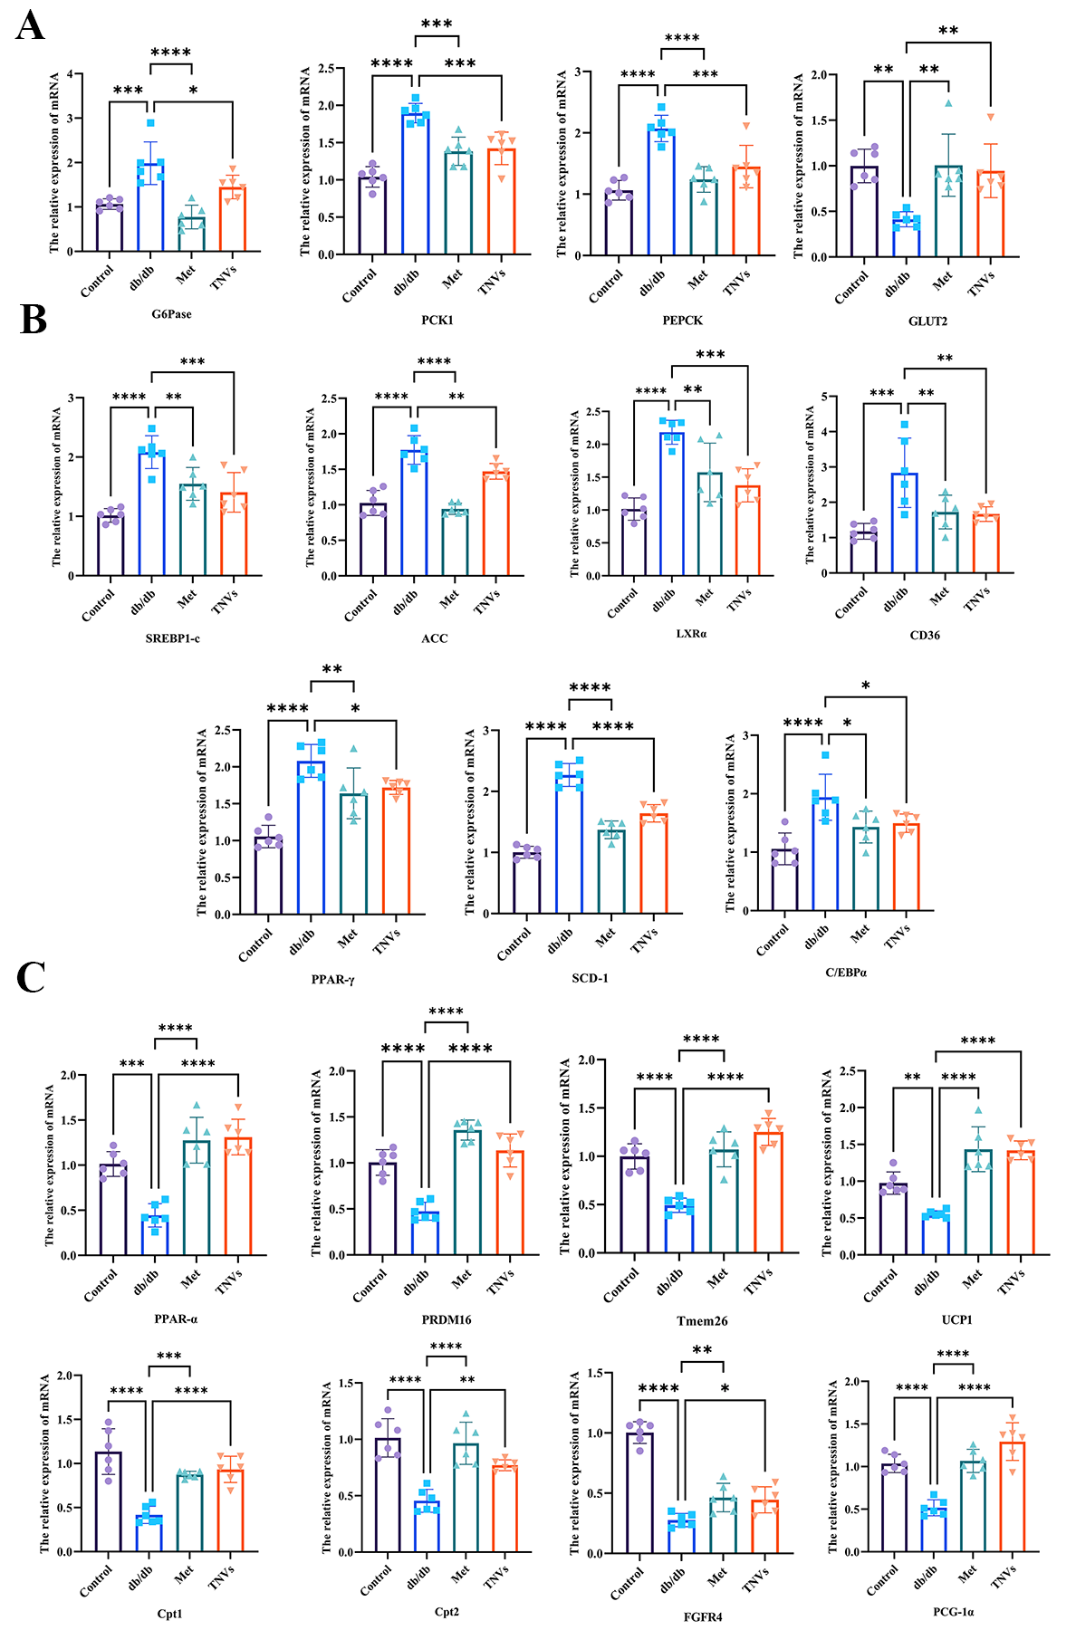


**Figure S2.** **Effect of TNVs on crucial genes involved in glycolysis, lipogenesis and FAO genes** **in *db/db* mice**. (A) Expression levels of G6Pase, PCK1, PEPCK, and GLUT2 mRNA. (B) Expression levels of SREBP-1c, ACC, LXR-α, CD36, PPAR-γ, SCD1, and CEBPα mRNA. (C) Expression levels of PPAR-α, PRDM16, Tmem26, UCP1, CPT1, CPT2, FGFR4, and PGC-1α mRNA. Results are expressed as means ± SEM. n = 6, compared with the *db/db* group, **p* < 0.05, ***p* < 0.01, ****p* < 0.001, *****p* < 0.0001.


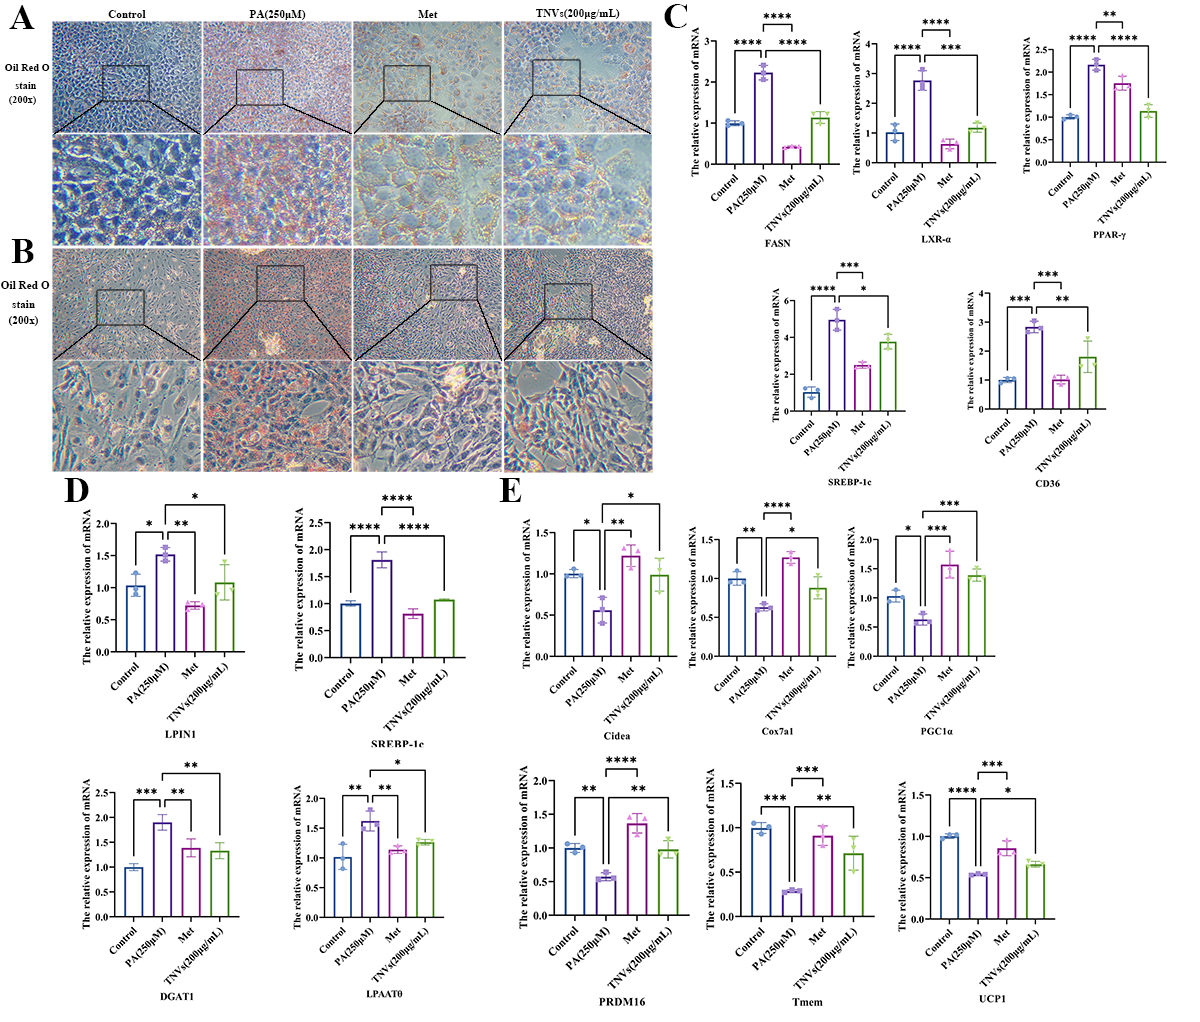


**Figure S3. TNVs mitigate lipid accumulation in AML-12 cells by down regulating adipogenic factor expression.** (A) Oil Red O staining in AML-12 cells. (B) Oil Red O staining in 3T3-L1 cells. (C) Expression levels of FASN, LXR-α, PPAR-γ, SREBP-1c, and CD36 mRNA in AML-12 cells. (D) Expression levels of LIPIN1, SREBP-1c, DGAT1, and LPAATθ mRNA in 3T3-L1 cells. (E) Expression levels of Cidea, Cox7a1, PGC-1α, Prdm16, Tmem26, and UCP1 mRNA in 3T3-L1 cells. Results are expressed as means ± SEM. n = 3, compared with the PA group, **p* < 0.05, ***p* < 0.01, ****p* < 0.001, *****p* < 0.0001.


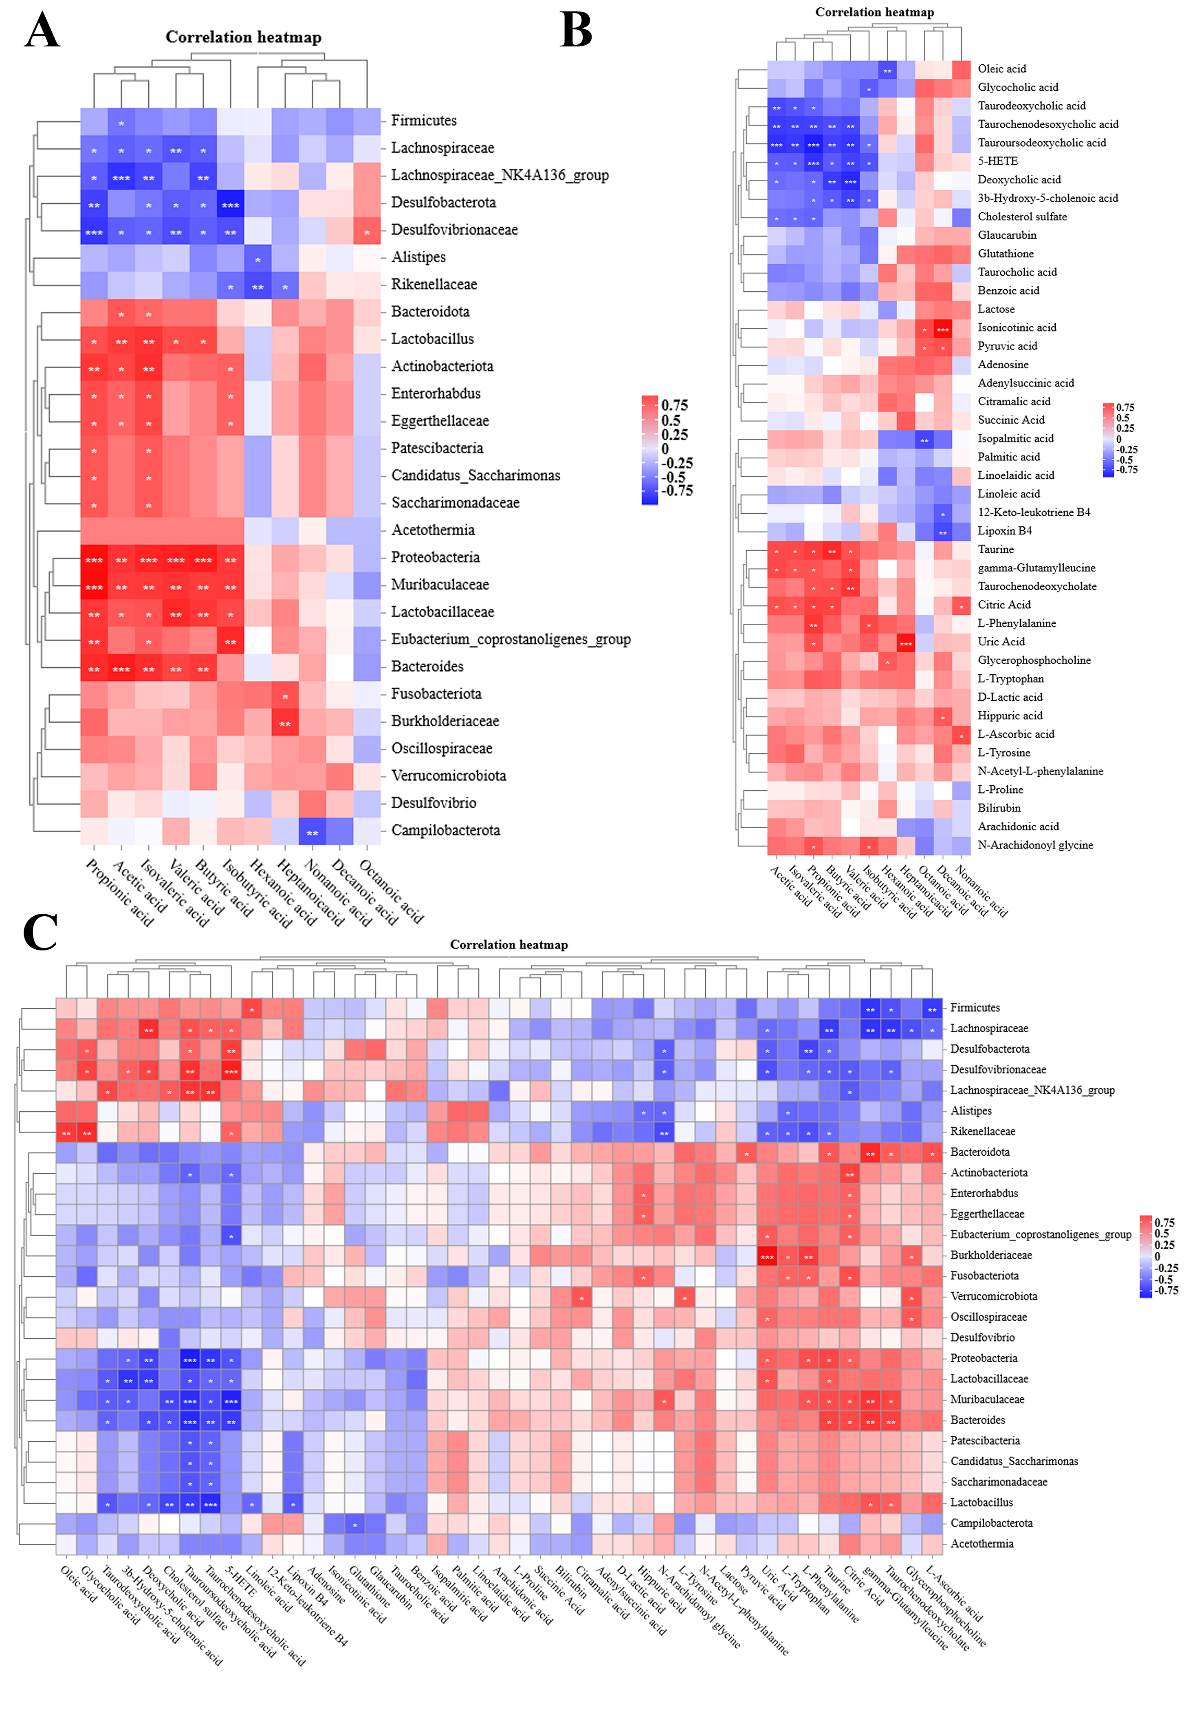


### Figure S4. Correlation analysis between gut microbiota, SCFAs and hepatic metabolites in *db/db* mice. (A) Correlation analysis of short-chain fatty acids and gut microbiota. (B) Correlation analysis of liver metabolites and SCFAs. (C) Correlation analysis of gut microbiota and liver metabolites. Results are expressed as means ± SEM. n = 3, **p* < 0.05, ***p* < 0.01, ****p* < 0.001.
